# Supplementary material for: Low-temperature synthesis of stable nanoTiO2–rGO composite colloids and their application in photoelectric films
Source: Royal Society of Chemistry journal article supplement (doi:10.1039/c3ra23095c), 2013-01-01
Supplement: c3ra23095c.pdf [file c3ra23095c.pdf]

Supporting Information for

**Low-temperature synthesis of stable nanoTiO<sub>2</sub>/rGO composite  
colloids and their application in photoelectric films**

**Hanyang Gao<sup>a</sup>, Wei Chen<sup>a</sup>, Jian Yuan<sup>a</sup>, Zhi Jiang<sup>a</sup>, Guoxin Hu<sup>b</sup>, Wenfeng Shangguan<sup>a,\*</sup>,  
Yangzhou Sun<sup>c</sup>, and Jiachun Su<sup>c</sup>**

<sup>a</sup> Research Center for Combustion and Environment Technology, Shanghai Jiao Tong University

<sup>b</sup> School of Mechanical and Power Engineering, Shanghai Jiao Tong University

<sup>c</sup> New Energy Research Institute, CNOOC NEI Co. Ltd.

\*Email: shangguan@sjtu.edu.cn. Phone: 86-21-34206020. Fax: 86-21-34206020.

### 1. Photocatalytic performance measurement:

Photoelectrochemical test systems were composed of a CHI 660D Electrochemical Analyzer, a 350 W xenon lamp, and a homemade electrochemical cell. A series of nanoTiO<sub>2</sub>/rGO films deposited on ITO-PET with same amount of nanoTiO<sub>2</sub> and different amount of rGO were prepared using scotch-tape method. The as-made films were fixed in a specially designed sample holder with a hole in diameter of 2 centimeters to let light in for measurements. We employed the nanoTiO<sub>2</sub>/rGO films as photoanodes, Pt as counter electrode, and Na<sub>2</sub>SO<sub>4</sub> (0.5 M) as electrolyte.

### 2. Decomposition of the gas-phase acetaldehyde:

The details of the acetaldehyde decomposition experimental procedure were showed in the following experimental flow chart:

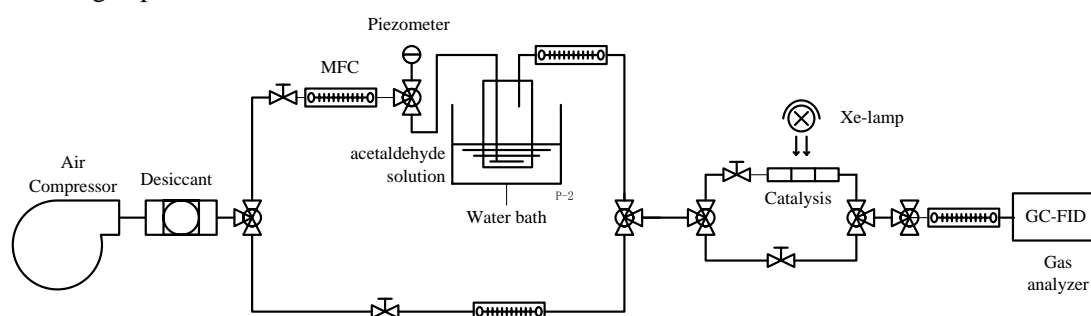

**Figure S1.** The flow chart of the acetaldehyde decomposition experiment.

### 3. Material preparation

|                           | TiO <sub>2</sub> | Sample A | Sample B | Sample C | Sample D | Sample E | Sample F |
|---------------------------|------------------|----------|----------|----------|----------|----------|----------|
| DI water (ml)             | 150              | 143.75   | 137.5    | 125      | 100      | 50       | 0        |
| Ti(OBu) <sub>4</sub> (ml) | 1                | 1        | 1        | 1        | 1        | 1        | 1        |
| PrOH (ml)                 | 1.5              | 1.5      | 1.5      | 1.5      | 1.5      | 1.5      | 1.5      |
| GO (ml)                   | 0                | 6.25     | 12.5     | 25       | 50       | 100      | 150      |

**Table S1.** The amount of GO, Ti(OBu)<sub>4</sub>, PrOH, DI water used for preparing nanoTiO<sub>2</sub>/rGO composites colloid. The GO concentration is 0.5mg/ml.

#### 4. Related analysis of the materials

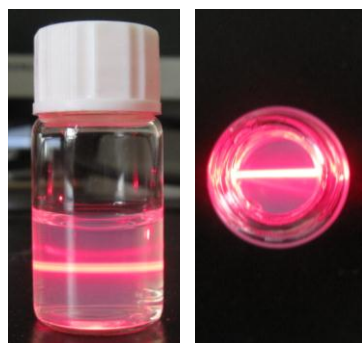

**Figure S2.** The Tyndall effect of nanoTiO<sub>2</sub> colloid.

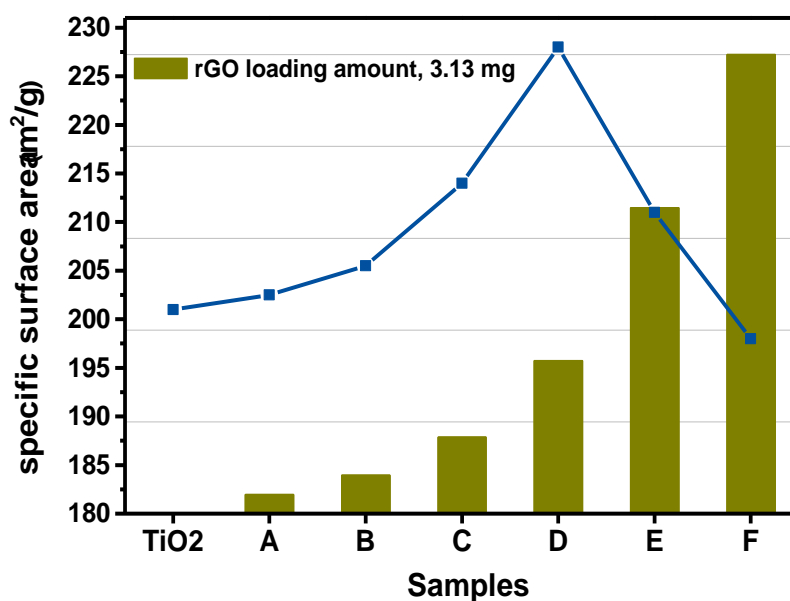

**Figure S3.** Specific surface area of nanoTiO<sub>2</sub>/rGO composites A-F.

After dried the samples at 50° C for 36 h, we tested the specific surface area of the powder using N<sub>2</sub>-BET. Fig S2 shows the results. Ascribe to the nanometer particle size, the specific surface area of TiO<sub>2</sub> particles we synthesized at low temperature is about 200 m<sup>2</sup>/g, much higher than commercial Degussa P25 TiO<sub>2</sub> (the surface area of P25 samples is 47m<sup>2</sup>/g). Loading proper quantity of graphene will increase the specific surface area, but excessive graphene will decrease the surface area. High specific surface is very important to DSSCs because it means being able to absorb more dye.

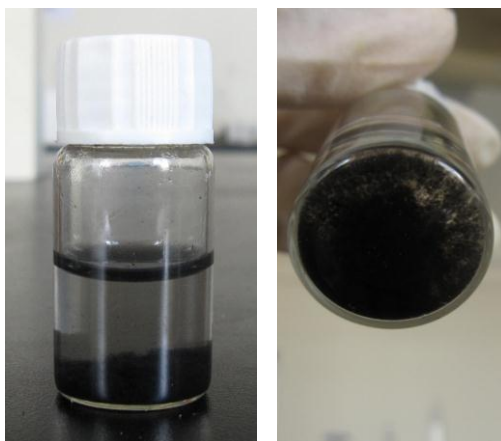

**Figure S4.** Prepare nanoTiO<sub>2</sub> and GO colloid separately and then mixed together, the stability of the colloid would immediately be destroyed.

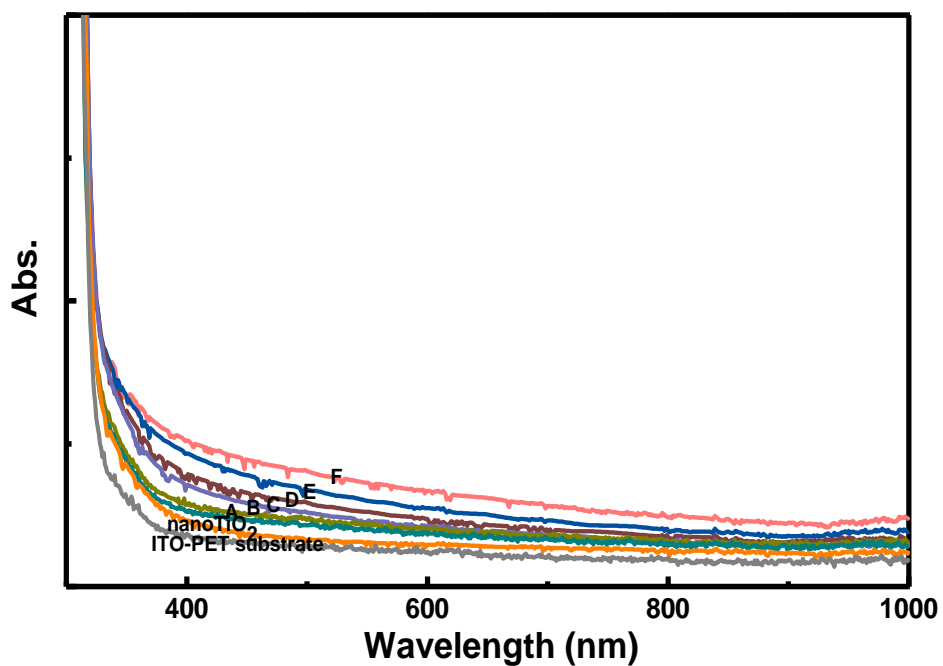

**Figure S5.** UV-vis absorption spectrum of the films deposited on PET using nanoTiO<sub>2</sub>/rGO colloid, sample A-F. Because the color of rGO is black, the absorption of the sample films increased with graphene loading amount increasing. To reference, the UV-vis spectra of ITO-PET substrate is also shown.
